# Supplementary material
Source: PubMed Central journal article supplement (PMC7294989)
Supplement: NIHMS1580700-supplement-8.pdf [file NIHMS1580700-supplement-8.pdf]

Table S1. Patient-derived clone library information related to Figure 1

| Study Pat. # (SPN) | Age | Sex | Emphysema CT       | Obstruction on Spirometry | Tobacco History                 | Histology                | Other lung disease | Hospital     | Tissue Collection    |
|--------------------|-----|-----|--------------------|---------------------------|---------------------------------|--------------------------|--------------------|--------------|----------------------|
| SPN-08             | 76  | F   | No                 | No                        | Never                           | No ABN                   | melanoma           | UCONN Health | Resection            |
| SPN-09             | 52  | F   | No                 | No                        | 20 pack years, quit 15 years    | inter pneu, No other ABN | ns inter pneu      | UCONN Health | Resection            |
| SPN-11             | 47  | F   | No                 | No                        | 30 pack years                   | Sarcoid, No other ABN    | sarcoidosis        | UCONN Health | Resection            |
| SPN-12             | 89  | M   | No                 | No                        | 20 pack years                   | inter pneu, No other ABN | ns inter pneu      | UCONN Health | Resection            |
| SPN-14             | 42  | F   | No                 | No                        | Never                           | No ABN                   | None               | UTHSC        | Transplant Donor     |
| SPN-18             | 61  | F   | No                 | No                        | Yes, quit 14 years              | No ABN                   | lung CA            | UCONN Health | Resection            |
| SPN-19             | 66  | F   | No                 | No                        | Never                           | Sarcoid, No other ABN    | lung CA, sarc      | UCONN Health | Resection            |
| SPN-21             | 39  | F   | No                 | No                        | Never                           | NA                       | granulo inflam     | UCONN Health | Resection            |
| SPN-28             | 76  | F   | No                 | No                        | 27 pack years, quit 1973        | No ABN                   | lung CA            | UCONN Health | Resection            |
| SPN-33             | NA  | NA  | NA                 | NA                        | NA                              | No ABN                   | NA                 | UIHC         | Transplant Donor     |
| SPN-03             | 59  | F   | No                 | No                        | Never                           | DIPNECH<br>No other ABN  | DIPNECH            | UCONN Health | Resection            |
| SPN-01             | 59  | M   | Mild               | No                        | 20 pack years, active           | Emphysema, INF, SCM      | lung CA            | UCONN Health | Resection            |
| SPN-02             | 61  | M   | Mild               | No                        | >70 pack years                  | Emphysema                | lung CA            | UCONN Health | Resection            |
| SPN-04             | 59  | M   | Yes                | Yes                       | 62 pack years, active           | Emphysema                | lung CA            | UCONN Health | Resection            |
| SPN-05             | 58  | M   | Mild               | No                        | 30 pack years, active           | Emphysema                | benign nodule      | UCONN Health | Resection            |
| SPN-06             | 59  | F   | Mild               | No                        | 20-40 pack years                | Emphysema<br>INF, SCM    | lung CA            | UCONN Health | Resection            |
| SPN-07             | 67  | M   | Upper lobes        | NA                        | Yes                             | Emphysema<br>INF, SCM    | melanoma           | UCONN Health | Resection            |
| SPN-10             | 55  | F   | Mild               | Yes                       | Yes, recent quit                | Emphysema<br>INF, SCM    | lung CA            | UCONN Health | Resection            |
| SPN-13             | 63  | M   | Yes                | Yes                       | 30 pack years, recent quit      | Emphysema<br>INF, SCM    | lung CA            | UCONN Health | Resection            |
| SPN-15             | 74  | M   | Mild               | yes                       | Yes, quit 14 years              | Emphysema<br>INF, SCM    | lung CA            | UCONN Health | Resection            |
| SPN-16             | 56  | M   | Mild               | Yes                       | 80 pack years, active           | Emphysema<br>INF, SCM    | lung CA            | UCONN Health | Resection            |
| SPN-17             | 65  | F   | Mild               | Yes                       | 40 pack years, not active       | Emphysema<br>INF         | lung CA            | UCONN Health | Resection            |
| SPN-20             | 56  | F   | NA                 | Yes                       | 20 pack years, quit 6 years     | Emphysema<br>INF, SCM    | lung CA            | UCONN Health | Resection            |
| SPN-23             | 69  | M   | Mild               | Yes                       | 50 pack years, active           | Emphysema                | lung CA            | UCONN Health | Resection            |
| SPN-24             | 70  | M   | Yes                | Yes                       | 45 pack years, recent quit      | Emphysema                | granuloma          | UCONN Health | Resection            |
| SPN-25             | 57  | M   | Mild               | Yes                       | >100 pack years, active         | Emphysema<br>INF, SCM    | lung CA            | UCONN Health | Resection            |
| SPN-26             | 66  | M   | Yes<br>Upper lobes | Yes                       | 40-50 pack years, D/Ced 2012    | Emphysema<br>INF, SCM    | lung CA            | UCONN Health | Resection            |
| SPN-27             | 63  | M   | Yes<br>Upper lobes | Yes                       | Extensive, active               | Emphysema                | lung CA            | UCONN Health | Resection            |
| SPN-31             | 68  | M   | Yes                | Yes                       | 47 pack years 6 year cessation  | Emphysema<br>INF         | none               | UIHC         | Transplant Recipient |
| SPN-32             | 65  | M   | Yes                | Yes                       | 100 pack years 3 year cessation | Emphysema<br>INF         | none               | UIHC         | Transplant Recipient |
