# Supplementary material
Source: PubMed Central journal article supplement (PMC7294989)
Supplement: NIHMS1580700-supplement-9.pdf [file NIHMS1580700-supplement-9.pdf]

Table S2. Clone library and xenograft information related to Figure 2

| Study Pat. #<br>(SPN)) | Patient Information |                              |                      | Xenografts from Clone Libraries |               |          |
|------------------------|---------------------|------------------------------|----------------------|---------------------------------|---------------|----------|
|                        | Emphysema<br>CT     | Obstruction<br>on spirometry | Clonogenic<br>cells% | Metaplasia                      | Leukocyte TEM | Fibrosis |
| SPN-08                 | No                  | No                           | 0.132                | GCM                             | Yes, Few      | Yes      |
| SPN-09                 | No                  | No                           | 0.141                | None                            | No            | No       |
| SPN-11                 | No                  | No                           | 0.153                | Few GCM                         | No            | No       |
| SPN-12                 | No                  | No                           | 0.132                | None                            | No            | No       |
| SPN-14                 | No                  | No                           | 0.158                | None                            | No            | No       |
| SPN-18                 | No                  | No                           | 0.15                 | Few GCM                         | No            | Yes      |
| SPN-19                 | No                  | No                           | 0.142                | Few GCM                         | No            | Yes      |
| SPN-21                 | No                  | No                           | 0.143                | None                            | No            | No       |
| SPN-28                 | No                  | No                           | 0.147                | Few GCM                         | No            | No       |
| SPN-33                 | NA                  | NA                           | 0.133                | Few GCM and SCM                 | No            | No       |
| SPN-03                 | No                  | No                           | 0.166                | Few GCM                         | No            | Yes      |
| SPN-01                 | Mild                | No                           | 0.774                | GCM and SCM                     | Yes           | Yes      |
| SPN-02                 | Mild                | No                           | 0.829                | GCM and SCM                     | Yes           | Yes      |
| SPN-04                 | Yes                 | Yes                          | 0.927                | GCM and SCM                     | Yes           | Yes      |
| SPN-05                 | Mild                | No                           | 0.912                | GCM and SCM                     | Yes           | Yes      |
| SPN-06                 | Mild                | No                           | 0.841                | GCM and SCM                     | Yes           | Yes      |
| SPN-07                 | Upper lobes         | NA                           | 0.868                | GCM and SCM                     | Yes           | Yes      |
| SPN-10                 | Mild                | Yes                          | 0.842                | GCM and SCM                     | Yes           | Yes      |
| SPN-13                 | Yes                 | Yes                          | 0.826                | GCM and SCM                     | Yes           | Yes      |
| SPN-15                 | Mild                | yes                          | 0.833                | GCM and SCM                     | Yes           | Yes      |
| SPN-16                 | Mild                | Yes                          | 0.896                | GCM and SCM                     | Yes           | Yes      |
| SPN-17                 | Mild                | Yes                          | 0.906                | GCM and SCM                     | Yes           | Yes      |
| SPN-20                 | Uncertain           | Yes                          | 0.888                | GCM and SCM                     | Yes           | Yes      |
| SPN-23                 | Mild                | Yes                          | 0.768                | GCM and SCM                     | Yes           | Yes      |
| SPN-24                 | Yes                 | Yes                          | 0.886                | GCM and SCM                     | Yes           | Yes      |
| SPN-25                 | Mild                | Yes                          | 0.796                | GCM and SCM                     | Yes           | Yes      |
| SPN-26                 | Upper lobes         | Yes                          | 0.836                | GCM and SCM                     | Yes           | Yes      |
| SPN-27                 | Upper lobes         | Yes                          | 0.84                 | GCM and SCM                     | Yes           | Yes      |
| SPN-31                 | Yes                 | Yes                          | 0.813                | GCM and SCM                     | Yes           | Yes      |
| SPN-32                 | Yes                 | Yes                          | 0.852                | GCM and SCM                     | Yes           | Yes      |
