# Supplementary material
Source: PubMed Central journal article supplement (PMC7294989)
Supplement: NIHMS1580700-supplement-10.pdf [file NIHMS1580700-supplement-10.pdf]

Table S3. Histology validation set information related to Figure 3

| Study Pat. # (SPN) | Age | Sex | Obstruction on Spirometry | Tobacco History | Histology                  | lung disease | Hospital |
|--------------------|-----|-----|---------------------------|-----------------|----------------------------|--------------|----------|
| SPN-14             | 42  | F   | No                        | Never           | No ABN                     | None         | UTHSC    |
| SPN-34*            | 36  | F   | NA                        | Never           | No ABN                     | None         | UNC      |
| SPN-35*            | 43  | M   | NA                        | Never           | No ABN                     | None         | UNC      |
| SPN-36             | 24  | F   | NA                        | NA              | No ABN                     | None         | UTHSC    |
| SPN-37*            | 55  | F   | NA                        | Never           | No ABN                     | None         | UNC      |
| SPN-38             | NA  | F   | Yes                       | NA              | Emphysema<br>GCM, SCM, INF | COPD         | UTHSC    |
| SPN-39             | 66  | F   | Yes                       | Yes             | Emphysema<br>GCM, SCM, INF | COPD         | UTHSC    |
| SPN-40             | 64  | M   | Yes                       | NA              | Emphysema<br>GCM, SCM, INF | COPD         | UTHSC    |
| SPN-41             | NA  | F   | Yes                       | NA              | Emphysema<br>GCM, SCM, INF | COPD         | UTHSC    |
| SPN-42             | 70  | F   | Yes                       | NA              | Emphysema<br>GCM, SCM, INF | COPD         | UTHSC    |
| SPN-43             | 65  | F   | Yes                       | NA              | Emphysema<br>GCM, SCM, INF | COPD         | UTHSC    |
| SPN-44             | 67  | F   | Yes                       | NA              | Emphysema<br>GCM, SCM, INF | COPD         | UTHSC    |
| SPN-45             | 32  | M   | NA                        | NA              | Emphysema<br>GCM, SCM, INF | COPD         | UIHC     |
| SPN-46             | 60  | M   | NA                        | NA              | Emphysema<br>GCM, SCM, INF | COPD         | UIHC     |
| SPN-47             | 68  | M   | NA                        | NA              | Emphysema<br>GCM, SCM, INF | COPD         | UIHC     |

\*Sections from patients reported in Okuda et al., 2019.

UNC: University of North Carolina at Chapel Hill

UTHSC: The University of Texas Health Science Center at Houston

UIHC: University of Iowa Hospitals & Clinics
