# Supplementary material
Source: PubMed Central journal article supplement (PMC7294989)
Supplement: NIHMS1580700-supplement-13.pdf [file NIHMS1580700-supplement-13.pdf]

Table S6. Related to Figure S3A (left). 119 differential expression genes in four clusters of scRNAseq of SPN-13.

| Gene symbol | p_val     | avg_logFC   | pct.1 | pct.2 | p_val_adj   | cluster |
|-------------|-----------|-------------|-------|-------|-------------|---------|
| COL17A1     | 1.25E-202 | 0.276137804 | 0.873 | 0.707 | 2.60E-198   | 1       |
| HADHA       | 1.50E-10  | 0.196082783 | 0.763 | 0.565 | 3.12E-06    | 1       |
| TIMP1       | 0         | 0.654343551 | 0.986 | 0.935 | 0           | 1       |
| NDRG1       | 1.96E-138 | 0.369980398 | 0.814 | 0.653 | 4.07E-134   | 1       |
| CA9         | 4.46E-255 | 0.365166236 | 0.598 | 0.307 | 9.28E-251   | 1       |
| HADHB       | 2.36E-07  | 0.231260592 | 0.674 | 0.433 | 0.004900329 | 1       |
| EIF3H       | 1.06E-285 | 0.278525512 | 0.989 | 0.967 | 2.20E-281   | 1       |
| ALDOA       | 9.61E-222 | 0.294811233 | 0.999 | 1     | 2.00E-217   | 1       |
| ADAMTS1     | 1.89E-07  | 0.147810215 | 0.472 | 0.382 | 0.003930413 | 1       |
| EIF4A1      | 2.08E-73  | 0.366849922 | 0.996 | 0.997 | 4.32E-69    | 1       |
| HSP90B1     | 8.23E-169 | 0.360544776 | 0.957 | 0.963 | 1.71E-164   | 1       |
| PIIB        | 2.02E-138 | 0.263442162 | 0.979 | 0.972 | 4.21E-134   | 1       |
| PDIA3       | 3.27E-256 | 0.3670775   | 0.883 | 0.767 | 6.81E-252   | 1       |
| SLC3A2      | 1.59E-81  | 0.352820202 | 0.845 | 0.812 | 3.32E-77    | 1       |
| EIF1        | 0         | 0.328128152 | 1     | 1     | 0           | 1       |
| SFN         | 1.39E-228 | 0.315194137 | 0.999 | 0.999 | 2.90E-224   | 1       |
| ZFAS1       | 0         | 0.366253337 | 1     | 1     | 0           | 1       |
| IMPDH2      | 2.40E-231 | 0.322874516 | 0.932 | 0.867 | 5.00E-227   | 1       |
| NPM1        | 0         | 0.416562884 | 1     | 0.999 | 0           | 1       |
| KRT14       | 5.24E-25  | 0.653647155 | 0.628 | 0.547 | 1.09E-20    | 1       |
| NAP1L1      | 0         | 0.359683321 | 0.999 | 0.998 | 0           | 1       |
| S100A4      | 1.08E-07  | 0.238360574 | 0.699 | 0.544 | 0.00225427  | 1       |
| S100A2      | 0         | 0.307866555 | 1     | 1     | 0           | 1       |
| AKR1B10     | 1.25E-272 | 0.2884256   | 0.499 | 0.203 | 2.60E-268   | 1       |
| TPM2        | 4.49E-150 | 0.360159188 | 0.761 | 0.591 | 9.35E-146   | 1       |
| RAET1G      | 1.14E-06  | 0.155663387 | 0.406 | 0.139 | 0.023646451 | 1       |
| SERPINB5    | 2.34E-07  | 0.227559362 | 0.823 | 0.689 | 0.004872536 | 1       |
| B4GALT1     | 0         | 0.61616129  | 0.893 | 0.436 | 0           | 2       |
| BIRC5       | 4.69E-09  | 0.164636469 | 0.868 | 0.75  | 9.75E-05    | 2       |
| CLSPN       | 2.23E-06  | 0.140116572 | 0.695 | 0.55  | 0.046430448 | 2       |
| TNRC6B      | 1.08E-08  | 0.188497199 | 0.685 | 0.503 | 0.000224649 | 2       |
| CDKN3       | 3.55E-08  | 0.139059529 | 0.874 | 0.77  | 0.000737529 | 2       |
| MYBL2       | 2.15E-06  | 0.114631878 | 0.644 | 0.516 | 0.044743584 | 2       |
| OAZ1        | 9.10E-14  | 0.149465861 | 1     | 1     | 1.89E-09    | 2       |
| H2AFV       | 4.18E-09  | 0.11688443  | 0.995 | 0.991 | 8.69E-05    | 2       |
| CACYBP      | 7.46E-08  | 0.111176924 | 0.929 | 0.894 | 0.001551426 | 2       |
| ICMT        | 2.40E-07  | 0.103913672 | 0.747 | 0.669 | 0.004999082 | 2       |
| PHF19       | 2.64E-08  | 0.18492093  | 0.86  | 0.749 | 0.000549894 | 2       |

|          |           |             |       |       |             |   |
|----------|-----------|-------------|-------|-------|-------------|---|
| GTF3A    | 1.51E-11  | 0.192372541 | 0.979 | 0.957 | 3.15E-07    | 2 |
| DEK      | 7.22E-12  | 0.181873634 | 0.99  | 0.981 | 1.50E-07    | 2 |
| LSM4     | 2.70E-13  | 0.163585563 | 0.998 | 0.994 | 5.62E-09    | 2 |
| RIN2     | 0         | 0.314710279 | 0.677 | 0.339 | 0           | 2 |
| CDK4     | 4.74E-11  | 0.186574147 | 0.951 | 0.91  | 9.87E-07    | 2 |
| NABP2    | 1.90E-08  | 0.133001492 | 0.854 | 0.766 | 0.000395065 | 2 |
| TP53     | 1.29E-09  | 0.192343265 | 0.651 | 0.472 | 2.68E-05    | 2 |
| ANP32E   | 5.72E-12  | 0.232057785 | 0.791 | 0.616 | 1.19E-07    | 2 |
| CISD2    | 3.45E-08  | 0.14959867  | 0.954 | 0.928 | 0.000717037 | 2 |
| SSRP1    | 1.81E-06  | 0.10393844  | 0.946 | 0.917 | 0.037713261 | 2 |
| ZDHHHC12 | 5.25E-12  | 0.180010926 | 0.985 | 0.971 | 1.09E-07    | 2 |
| SPC24    | 0         | 0.340882896 | 0.647 | 0.255 | 0           | 2 |
| TRA2A    | 2.08E-265 | 0.298522563 | 0.728 | 0.47  | 4.32E-261   | 2 |
| FAM96A   | 1.51E-07  | 0.115969588 | 0.912 | 0.862 | 0.003144415 | 2 |
| SAC3D1   | 1.74E-06  | 0.119471234 | 0.74  | 0.657 | 0.036298065 | 2 |
| DTYMK    | 6.68E-12  | 0.185878698 | 0.951 | 0.88  | 1.39E-07    | 2 |
| TOR1AIP2 | 0         | 0.357809771 | 0.865 | 0.622 | 0           | 2 |
| COPRS    | 5.86E-13  | 0.17990347  | 0.918 | 0.833 | 1.22E-08    | 2 |
| YIF1A    | 3.97E-09  | 0.152943776 | 0.94  | 0.912 | 8.26E-05    | 2 |
| CTDNEP1  | 1.48E-09  | 0.135125545 | 0.942 | 0.899 | 3.08E-05    | 2 |
| TYMS     | 1.99E-08  | 0.110324629 | 0.833 | 0.757 | 0.000413547 | 2 |
| R3HDM2   | 1.65E-07  | 0.137442551 | 0.478 | 0.288 | 0.003422601 | 2 |
| DCTPP1   | 1.70E-06  | 0.12273046  | 0.901 | 0.853 | 0.035395374 | 2 |
| TCEA1    | 1.63E-10  | 0.145059773 | 0.977 | 0.958 | 3.40E-06    | 2 |
| CD47     | 1.36E-08  | 0.173310172 | 0.945 | 0.902 | 0.000283685 | 2 |
| PDGFA    | 9.62E-07  | 0.123851607 | 0.518 | 0.375 | 0.020011318 | 2 |
| HMG2     | 6.15E-13  | 0.191527779 | 0.999 | 0.998 | 1.28E-08    | 2 |
| LSM2     | 1.82E-18  | 0.161378615 | 0.985 | 0.97  | 3.79E-14    | 2 |
| APOBEC3C | 5.06E-274 | 0.333282231 | 0.761 | 0.499 | 1.05E-269   | 2 |
| EPPK1    | 1.46E-307 | 0.332909426 | 0.657 | 0.346 | 3.03E-303   | 2 |
| RDH11    | 2.89E-10  | 0.166393653 | 0.54  | 0.33  | 6.00E-06    | 3 |
| FDFT1    | 1.05E-302 | 0.434588579 | 0.823 | 0.504 | 2.19E-298   | 3 |
| SCD      | 0         | 0.919612896 | 0.944 | 0.385 | 0           | 3 |
| SLC25A1  | 1.06E-14  | 0.228857546 | 0.788 | 0.632 | 2.20E-10    | 3 |
| SQLE     | 0         | 0.592310421 | 0.907 | 0.517 | 0           | 3 |
| TMEM97   | 3.13E-08  | 0.153613295 | 0.5   | 0.317 | 0.000651375 | 3 |
| MVK      | 2.61E-17  | 0.230789063 | 0.542 | 0.215 | 5.42E-13    | 3 |
| HMGCS1   | 0         | 0.379056131 | 0.595 | 0.125 | 0           | 3 |
| HMGCR    | 0         | 0.315535178 | 0.598 | 0.2   | 0           | 3 |
| ACAT2    | 7.22E-241 | 0.350150204 | 0.699 | 0.372 | 1.50E-236   | 3 |
| ACLY     | 3.80E-152 | 0.267597072 | 0.671 | 0.425 | 7.90E-148   | 3 |

|          |           |             |       |       |             |   |
|----------|-----------|-------------|-------|-------|-------------|---|
| EBP      | 1.34E-162 | 0.33323523  | 0.95  | 0.851 | 2.78E-158   | 3 |
| FDPS     | 0         | 0.490389444 | 0.96  | 0.786 | 0           | 3 |
| MVD      | 0         | 0.393949134 | 0.627 | 0.185 | 0           | 3 |
| FASN     | 0         | 0.420749106 | 0.781 | 0.409 | 0           | 3 |
| DHCR7    | 0         | 0.323498905 | 0.61  | 0.145 | 0           | 3 |
| PGP      | 1.58E-105 | 0.254090895 | 0.943 | 0.814 | 3.28E-101   | 3 |
| PCYT2    | 1.10E-08  | 0.203302078 | 0.559 | 0.33  | 0.00022782  | 3 |
| INSIG1   | 0         | 0.522957317 | 0.73  | 0.071 | 0           | 3 |
| IL8      | 0         | 0.818664357 | 0.933 | 0.607 | 0           | 4 |
| HS3ST1   | 3.45E-12  | 0.222537451 | 0.66  | 0.387 | 7.17E-08    | 4 |
| PLAUR    | 1.30E-188 | 0.314578833 | 0.648 | 0.359 | 2.70E-184   | 4 |
| BID      | 2.30E-10  | 0.227757614 | 0.945 | 0.831 | 4.79E-06    | 4 |
| BIRC3    | 0         | 0.392307267 | 0.675 | 0.274 | 0           | 4 |
| MAP2K3   | 5.53E-09  | 0.192757625 | 0.874 | 0.731 | 0.00011499  | 4 |
| TRAM1    | 1.39E-08  | 0.117129348 | 0.954 | 0.875 | 0.00028993  | 4 |
| MAST4    | 6.31E-11  | 0.14132714  | 0.689 | 0.545 | 1.31E-06    | 4 |
| TRAF4    | 3.65E-11  | 0.210847565 | 0.931 | 0.82  | 7.60E-07    | 4 |
| NFKBIA   | 4.07E-204 | 0.435301922 | 0.778 | 0.549 | 8.47E-200   | 4 |
| SNX3     | 3.30E-16  | 0.161793532 | 1     | 0.996 | 6.87E-12    | 4 |
| CCND3    | 2.56E-07  | 0.131128103 | 0.827 | 0.682 | 0.005328673 | 4 |
| HBEGF    | 2.14E-155 | 0.269419832 | 0.833 | 0.578 | 4.45E-151   | 4 |
| CCL20    | 1.01E-240 | 0.637140609 | 0.665 | 0.333 | 2.11E-236   | 4 |
| TNFAIP3  | 1.18E-299 | 0.286380721 | 0.682 | 0.29  | 2.46E-295   | 4 |
| PLAU     | 0         | 0.546400984 | 0.921 | 0.617 | 0           | 4 |
| CDC42EP1 | 2.94E-10  | 0.219822286 | 0.799 | 0.609 | 6.11E-06    | 4 |
| RAC1     | 5.26E-09  | 0.146675191 | 1     | 1     | 0.00010932  | 4 |
| PIM1     | 2.32E-06  | 0.153681553 | 0.587 | 0.448 | 0.04835538  | 4 |
| TPM1     | 5.49E-07  | 0.177291797 | 0.99  | 0.95  | 0.0114165   | 4 |
| TINAGL1  | 9.97E-16  | 0.214845692 | 0.99  | 0.956 | 2.07E-11    | 4 |
| TNIP1    | 3.65E-217 | 0.272857879 | 0.905 | 0.713 | 7.60E-213   | 4 |
| IFNGR2   | 7.62E-08  | 0.20660625  | 0.924 | 0.82  | 0.001585526 | 4 |
| CSTB     | 3.91E-07  | 0.115893359 | 1     | 1     | 0.008130275 | 4 |
| CXCL16   | 9.46E-07  | 0.165590051 | 0.788 | 0.616 | 0.019671636 | 4 |
| CLDN1    | 4.41E-07  | 0.205810726 | 0.795 | 0.636 | 0.009178011 | 4 |
| CXCL1    | 3.33E-294 | 0.511858159 | 0.726 | 0.349 | 6.92E-290   | 4 |
| CEBPB    | 2.59E-08  | 0.175048919 | 0.878 | 0.778 | 0.000539152 | 4 |
| PTP4A2   | 9.09E-21  | 0.236860605 | 0.99  | 0.921 | 1.89E-16    | 4 |
| UBE2F    | 6.11E-07  | 0.147615928 | 0.929 | 0.826 | 0.012714112 | 4 |
| SPATS2L  | 6.66E-15  | 0.207918153 | 0.991 | 0.97  | 1.39E-10    | 4 |
| PIM3     | 6.99E-08  | 0.218644692 | 0.889 | 0.767 | 0.001454772 | 4 |
