# Supplementary material
Source: PubMed Central journal article supplement (PMC7294989)
Supplement: NIHMS1580700-supplement-14.pdf [file NIHMS1580700-supplement-14.pdf]

Table S7. Related to Figure S3A (right). 119 differential expression genes in four clusters of mRNAseq of SPN-13, which are consistent with differential expression genes in scRNAseq of SPN-13.

| Gene symbol | CLST1_1     | CLST1_2     | CLST2_1     | CLST2_2     | CLST3_1     | CLST3_2     | CLST4_1     | CLST4_2     |
|-------------|-------------|-------------|-------------|-------------|-------------|-------------|-------------|-------------|
| COL17A1     | 400.868754  | 391.03235   | 303.318901  | 303.585724  | 241.950363  | 250.684653  | 276.040549  | 255.229115  |
| HADHA       | 104.645495  | 105.351688  | 98.099596   | 98.652713   | 83.249495   | 88.210795   | 91.083748   | 92.338346   |
| TIMP1       | 472.486784  | 490.351434  | 274.001532  | 277.281194  | 201.969267  | 207.104482  | 434.48228   | 404.767141  |
| NDRG1       | 305.283357  | 328.907762  | 199.381161  | 199.438099  | 215.261515  | 225.318872  | 286.040849  | 304.815805  |
| CA9         | 59.494999   | 59.141065   | 16.047901   | 17.442031   | 16.718857   | 15.41815    | 56.198348   | 51.679205   |
| HADHB       | 73.168254   | 73.708297   | 69.053313   | 66.821671   | 65.450721   | 60.624557   | 64.358076   | 64.224132   |
| EIF3H       | 282.266228  | 237.818296  | 229.791661  | 243.201617  | 226.764031  | 240.092212  | 238.249006  | 195.888523  |
| ALDOA       | 1916.105169 | 1829.572251 | 1789.143026 | 1768.10914  | 1624.636231 | 1674.782409 | 1703.812039 | 1561.004016 |
| ADAMTS1     | 99.288147   | 110.12507   | 72.778563   | 72.870219   | 67.143533   | 67.346622   | 64.808503   | 61.769524   |
| EIF4A1      | 698.337887  | 683.991928  | 533.259419  | 534.013936  | 563.365466  | 573.07671   | 430.033948  | 413.89676   |
| HSP90B1     | 814.411699  | 748.125071  | 675.583138  | 671.954332  | 492.389582  | 513.098032  | 480.994792  | 463.015652  |
| PPIB        | 490.447882  | 509.665298  | 407.76098   | 398.769059  | 399.221025  | 385.820991  | 345.37613   | 345.26939   |
| PDIA3       | 433.337751  | 410.00306   | 390.10633   | 387.830697  | 321.824983  | 323.027036  | 398.228367  | 336.767749  |
| SLC3A2      | 1055.695846 | 944.620156  | 735.266559  | 724.658584  | 691.932165  | 790.152269  | 445.49946   | 422.644562  |
| EIF1        | 708.123682  | 712.732336  | 639.282136  | 617.729602  | 642.23049   | 628.36226   | 659.697036  | 688.546813  |
| SFN         | 1366.058291 | 1313.903176 | 1140.038991 | 1145.770851 | 1180.260632 | 1286.120405 | 1172.348009 | 1169.724042 |
| ZFAS1       | 549.954154  | 466.583227  | 450.033364  | 415.877937  | 446.135918  | 418.947573  | 483.234209  | 372.984499  |
| IMPDH2      | 206.113246  | 190.438281  | 182.000813  | 185.426818  | 170.144606  | 167.672016  | 113.614233  | 110.959929  |
| NPM1        | 2240.366917 | 1864.932574 | 1538.824578 | 1636.631792 | 1685.451963 | 1698.074851 | 1344.193833 | 933.120503  |
| KRT14       | 3586.278729 | 3614.310668 | 3162.892253 | 3164.987194 | 3028.537671 | 3312.398547 | 3252.318064 | 3387.4784   |
| NAP1L1      | 261.433585  | 248.176443  | 240.62183   | 242.407291  | 193.828184  | 201.327138  | 157.781896  | 133.593086  |
| S100A4      | 147.631616  | 158.684501  | 106.536512  | 104.394558  | 101.791163  | 91.94412    | 101.536597  | 114.517183  |
| S100A2      | 16583.90839 | 16734.18555 | 15179.25581 | 15112.45212 | 15604.70943 | 15226.38119 | 12591.64825 | 13282.44128 |
| AKR1B10     | 41.433191   | 41.348589   | 23.257861   | 24.329202   | 17.974866   | 18.641435   | 6.679098    | 7.58164     |
| TPM2        | 63.656095   | 59.078571   | 47.631183   | 49.988558   | 27.482542   | 27.014005   | 11.956601   | 10.566922   |
| RAET1G      | 44.742555   | 42.534108   | 27.289903   | 29.212172   | 31.735589   | 33.618827   | 18.1997     | 17.564646   |
| SERPINB5    | 373.980534  | 353.200937  | 213.532323  | 218.567762  | 300.636447  | 293.43548   | 244.518899  | 232.624939  |
| B4GALT1     | 38.266488   | 36.94386    | 43.984167   | 43.521471   | 26.421771   | 28.260174   | 41.212051   | 39.654507   |
| BIRC5       | 43.232927   | 39.456977   | 48.577484   | 48.079309   | 23.690552   | 26.022971   | 17.004039   | 13.992854   |
| CLSPN       | 9.064672    | 10.169577   | 12.119399   | 13.294593   | 6.683422    | 6.159535    | 3.28191     | 3.87976     |
| TNRC6B      | 5.340758    | 4.52651     | 6.532929    | 6.923057    | 6.275374    | 4.524428    | 5.788471    | 6.094013    |
| CDKN3       | 48.955043   | 52.570353   | 63.301879   | 60.72654    | 34.588787   | 32.237336   | 17.462612   | 18.216322   |
| MYBL2       | 13.117199   | 13.169065   | 15.266853   | 15.248832   | 10.208119   | 11.368861   | 3.500698    | 3.993873    |
| OAZ1        | 737.343005  | 826.959702  | 966.965684  | 945.878528  | 840.514028  | 932.731348  | 679.85258   | 741.995344  |
| H2AFV       | 152.846527  | 160.187199  | 195.771432  | 189.720053  | 116.830273  | 124.23244   | 77.263283   | 82.87528    |
| CACYBP      | 132.949921  | 130.377782  | 138.002918  | 142.340988  | 102.889645  | 112.105704  | 65.252476   | 73.359548   |
| ICMT        | 50.836331   | 53.269969   | 65.43883    | 67.41241    | 50.290748   | 48.40954    | 38.478894   | 40.492624   |
| PHF19       | 37.221793   | 36.085732   | 50.346793   | 48.20252    | 23.353269   | 25.760432   | 16.63173    | 17.208457   |
| GTF3A       | 58.879391   | 60.612011   | 65.201582   | 64.050396   | 61.976911   | 58.445144   | 39.885817   | 38.112169   |
| DEK         | 81.543602   | 77.316953   | 104.331325  | 96.570308   | 54.197184   | 53.675735   | 41.136387   | 41.884622   |
| LSM4        | 192.365365  | 164.713602  | 190.715642  | 194.910902  | 157.836348  | 166.028273  | 127.911099  | 115.040021  |
| RIN2        | 15.747262   | 18.08301    | 23.017992   | 22.424126   | 16.055419   | 16.61096    | 20.856083   | 22.020322   |
| CDK4        | 99.216164   | 108.059253  | 122.126058  | 119.528382  | 103.158384  | 101.650538  | 42.127041   | 56.238214   |
| NABP2       | 38.043192   | 29.021027   | 39.135534   | 39.11594    | 31.254097   | 26.768478   | 21.622308   | 23.256532   |

|          |            |            |            |            |            |            |            |            |
|----------|------------|------------|------------|------------|------------|------------|------------|------------|
| TP53     | 24.438978  | 25.09263   | 57.436462  | 59.041073  | 26.668666  | 30.700725  | 27.589914  | 28.485716  |
| ANP32E   | 35.398562  | 31.719228  | 35.210381  | 37.408642  | 21.879478  | 25.267993  | 15.102409  | 16.580474  |
| CISD2    | 29.213626  | 25.589783  | 29.73774   | 30.456129  | 25.51079   | 25.800106  | 20.740094  | 18.54307   |
| SSRP1    | 91.579839  | 89.441914  | 96.356041  | 96.661403  | 73.548668  | 73.122914  | 45.566594  | 42.558656  |
| ZDHC12   | 57.263661  | 50.93311   | 63.768883  | 68.320322  | 52.981798  | 47.827135  | 38.350684  | 38.238378  |
| SPC24    | 6.361009   | 7.650132   | 10.958673  | 10.253793  | 6.607793   | 6.965932   | 2.945319   | 4.1912     |
| TRA2A    | 75.768237  | 79.466386  | 91.874521  | 84.223858  | 70.694849  | 79.42064   | 53.083243  | 54.709675  |
| FAM96A   | 73.876517  | 70.401841  | 98.399455  | 92.567767  | 74.226649  | 76.777672  | 60.322092  | 62.404081  |
| SAC3D1   | 6.513316   | 6.486254   | 10.202032  | 9.544354   | 6.053776   | 6.960878   | 5.347346   | 4.165518   |
| DTYMK    | 57.518304  | 54.7802    | 64.571616  | 63.507641  | 47.950123  | 46.966828  | 30.765798  | 30.084332  |
| TOR1AIP2 | 16.09456   | 13.603149  | 20.346298  | 19.840524  | 19.066888  | 18.922652  | 18.690929  | 19.014332  |
| COPRS    | 38.52547   | 38.889035  | 45.73856   | 42.246876  | 37.361233  | 35.010537  | 24.679578  | 23.81865   |
| YIF1A    | 117.620534 | 109.987283 | 115.983604 | 124.498138 | 104.744265 | 120.129792 | 87.957546  | 85.756898  |
| CTDNEP1  | 48.923433  | 50.869249  | 54.783104  | 54.300626  | 46.413994  | 42.803178  | 42.078951  | 37.697889  |
| TYMS     | 82.093197  | 78.66592   | 100.55862  | 100.034351 | 54.488231  | 53.959306  | 29.541905  | 30.928284  |
| R3HDM2   | 13.311878  | 13.517453  | 22.78127   | 17.028742  | 14.488398  | 15.052765  | 15.309988  | 13.424662  |
| DCTPP1   | 70.486813  | 70.364991  | 82.554689  | 81.942866  | 70.00944   | 75.022065  | 42.208803  | 45.359917  |
| TCEA1    | 61.809605  | 65.019487  | 76.123077  | 72.286092  | 66.087868  | 63.411656  | 45.969391  | 46.716918  |
| CD47     | 86.908177  | 84.488752  | 101.11992  | 98.585569  | 60.12424   | 59.56848   | 95.579369  | 89.170999  |
| PDGFA    | 6.685244   | 7.256895   | 13.007466  | 12.431231  | 10.635022  | 11.228839  | 8.131043   | 9.61014    |
| HMG2     | 413.690953 | 392.162047 | 463.355184 | 452.781227 | 322.822796 | 330.144275 | 192.396864 | 183.504514 |
| LSM2     | 51.626909  | 55.973918  | 68.983428  | 68.781852  | 46.769649  | 45.604557  | 30.548423  | 33.10971   |
| APOBEC3C | 38.608065  | 38.424706  | 44.850774  | 44.986587  | 28.56841   | 28.056032  | 34.043342  | 29.231888  |
| EPPK1    | 9.454887   | 8.454932   | 9.423295   | 9.607271   | 6.887293   | 6.839031   | 8.145939   | 8.150747   |
| RDH11    | 26.578105  | 28.832582  | 42.308077  | 42.641563  | 53.243032  | 54.091226  | 48.877621  | 46.531969  |
| FDFT1    | 65.595025  | 70.067281  | 132.808565 | 133.013301 | 227.131391 | 245.838662 | 207.494084 | 206.921942 |
| SCD      | 40.294907  | 37.970952  | 144.626112 | 140.867936 | 175.268835 | 175.649703 | 148.440971 | 140.450279 |
| SLC25A1  | 22.801451  | 23.310182  | 42.386327  | 41.611416  | 49.66727   | 55.226022  | 38.375763  | 34.057797  |
| SQLE     | 27.356999  | 25.758611  | 34.981332  | 34.395459  | 63.212906  | 62.444778  | 53.104148  | 47.255507  |
| TMEM97   | 5.363651   | 5.5981     | 7.890322   | 7.66943    | 11.418478  | 9.620914   | 3.800984   | 4.017223   |
| MVK      | 9.988108   | 9.846013   | 31.025213  | 26.510177  | 34.504885  | 34.841137  | 28.479619  | 30.043779  |
| HMGCS1   | 28.990416  | 27.171471  | 39.794755  | 39.166952  | 118.462189 | 114.73685  | 73.626768  | 76.067417  |
| HMGCR    | 49.122109  | 55.138103  | 62.960482  | 57.337106  | 105.050425 | 115.850292 | 79.427168  | 86.118162  |
| ACAT2    | 14.391381  | 13.963336  | 30.660527  | 26.735236  | 50.75549   | 52.805868  | 40.800916  | 39.560361  |
| ACLY     | 51.471129  | 51.390681  | 68.672606  | 67.625338  | 108.725318 | 109.837187 | 67.93532   | 64.692383  |
| EBP      | 58.942795  | 75.584572  | 96.399429  | 89.431828  | 106.061354 | 113.911478 | 74.185535  | 71.223698  |
| FDPS     | 100.839267 | 93.383163  | 156.897604 | 147.529032 | 208.475305 | 199.958909 | 176.92373  | 155.894173 |
| MVD      | 33.192316  | 22.928942  | 52.89002   | 62.213593  | 118.005791 | 112.974051 | 65.203137  | 66.086975  |
| FASN     | 42.872834  | 44.367471  | 83.097326  | 73.83016   | 130.635493 | 133.367958 | 82.971975  | 74.986027  |
| DHCR7    | 20.790061  | 19.813054  | 53.417885  | 59.191811  | 109.318992 | 126.539541 | 71.234005  | 76.768448  |
| PGP      | 13.676214  | 12.862322  | 15.892376  | 17.376764  | 17.208674  | 18.501265  | 12.801272  | 13.734963  |
| PCYT2    | 17.126166  | 16.244574  | 21.068882  | 21.708796  | 33.84903   | 36.566422  | 19.812546  | 19.860793  |
| INSIG1   | 4.655443   | 4.107956   | 8.106202   | 9.397929   | 16.717826  | 16.729913  | 12.669362  | 11.356854  |
| CXCL8    | 163.704147 | 174.707562 | 164.920654 | 159.758897 | 124.318581 | 117.980008 | 800.228319 | 792.137294 |
| HS3ST1   | 14.171063  | 14.040641  | 6.956935   | 5.141439   | 6.89432    | 7.078775   | 16.120797  | 14.930033  |
| PLAUR    | 51.467899  | 56.199936  | 39.811091  | 39.371879  | 24.603577  | 23.124007  | 86.911994  | 78.650813  |
| BID      | 76.265959  | 65.803336  | 61.07856   | 64.950889  | 73.18145   | 69.144511  | 110.149114 | 103.924556 |

|          |            |            |            |            |            |            |            |             |
|----------|------------|------------|------------|------------|------------|------------|------------|-------------|
| BIRC3    | 22.152643  | 22.605473  | 19.808302  | 21.379123  | 12.359115  | 12.183519  | 52.518705  | 52.199858   |
| MAP2K3   | 48.653646  | 50.155941  | 39.029837  | 39.083536  | 44.62926   | 43.734842  | 62.927284  | 62.887996   |
| TRAM1    | 138.299683 | 138.097772 | 150.188046 | 151.564564 | 190.779227 | 193.279822 | 214.807503 | 221.591467  |
| MST4     | 15.509475  | 14.143353  | 9.332494   | 9.479178   | 11.70547   | 14.281607  | 14.613382  | 18.620292   |
| TRAF4    | 105.995345 | 99.366964  | 92.259453  | 92.476219  | 70.524542  | 80.541168  | 144.490931 | 143.906696  |
| NFKBIA   | 95.342725  | 88.656589  | 96.543786  | 93.224113  | 49.550692  | 48.250745  | 186.002697 | 179.582298  |
| SNX3     | 117.715966 | 124.599232 | 127.0249   | 127.541324 | 129.37745  | 126.008377 | 142.105259 | 137.550303  |
| CCND3    | 76.262175  | 76.168     | 78.788249  | 86.667846  | 71.550971  | 76.750068  | 93.843167  | 91.955307   |
| HBEGF    | 117.524623 | 117.211642 | 29.517966  | 29.49205   | 35.329526  | 31.247573  | 179.996479 | 178.927641  |
| CCL20    | 49.918444  | 51.685159  | 21.981888  | 22.995001  | 74.220824  | 68.023581  | 779.493417 | 799.415434  |
| TNFAIP3  | 81.056883  | 76.797391  | 35.582247  | 37.381218  | 32.70621   | 28.008875  | 152.118854 | 130.971561  |
| PLAU     | 155.332113 | 153.900219 | 109.585676 | 108.875987 | 110.190335 | 102.849808 | 271.245474 | 276.288853  |
| CDC42EP1 | 33.227636  | 28.42979   | 41.757047  | 42.009577  | 29.473969  | 31.218402  | 65.822465  | 61.21705    |
| RAC1     | 247.361053 | 227.598832 | 217.653508 | 238.552662 | 220.568066 | 223.073548 | 282.478104 | 267.767295  |
| PIM1     | 35.965284  | 37.120645  | 29.832087  | 28.975439  | 28.567063  | 28.157154  | 59.415167  | 62.223394   |
| TPM1     | 104.69145  | 108.300731 | 200.573409 | 182.52714  | 177.852226 | 174.477967 | 283.648026 | 284.234251  |
| TINAGL1  | 245.293382 | 268.24106  | 285.726424 | 289.622696 | 193.662164 | 205.626947 | 334.413001 | 342.230892  |
| TNIP1    | 78.462525  | 79.143762  | 91.02998   | 87.966005  | 95.631576  | 93.694026  | 160.386493 | 159.325967  |
| IFNGR2   | 56.00336   | 55.514914  | 47.572918  | 44.523744  | 46.022716  | 44.584119  | 63.545598  | 59.686177   |
| CSTB     | 701.925959 | 683.095264 | 845.53944  | 852.046344 | 886.854177 | 896.656522 | 1521.18668 | 1344.226593 |
| CXCL16   | 34.460828  | 35.211063  | 44.902892  | 45.919721  | 33.082622  | 30.325699  | 70.848872  | 66.465628   |
| CLDN1    | 88.466399  | 93.084478  | 162.119576 | 160.741546 | 134.239052 | 134.699965 | 247.086135 | 239.920161  |
| CXCL1    | 101.177784 | 102.251319 | 81.44851   | 84.770341  | 32.344178  | 31.558878  | 271.672969 | 265.475694  |
| CEBPB    | 18.721496  | 20.476951  | 24.628668  | 22.684091  | 19.242993  | 20.225185  | 34.173772  | 30.713903   |
| PTP4A2   | 213.95806  | 229.392968 | 220.246727 | 234.390804 | 231.451403 | 242.382411 | 302.04735  | 318.115992  |
| UBE2F    | 36.295944  | 32.686454  | 27.595373  | 26.603182  | 34.398679  | 35.039848  | 44.408186  | 37.080667   |
| SPATS2L  | 91.254907  | 95.848271  | 141.696796 | 141.842016 | 118.541445 | 112.518447 | 186.63559  | 190.174782  |
| PIM3     | 23.59662   | 21.826477  | 26.684984  | 27.130932  | 21.802359  | 23.122381  | 33.955008  | 30.869349   |
