# Supplementary material
Source: PubMed Central journal article supplement (PMC7294989)

Figure S1 related to Figure 2

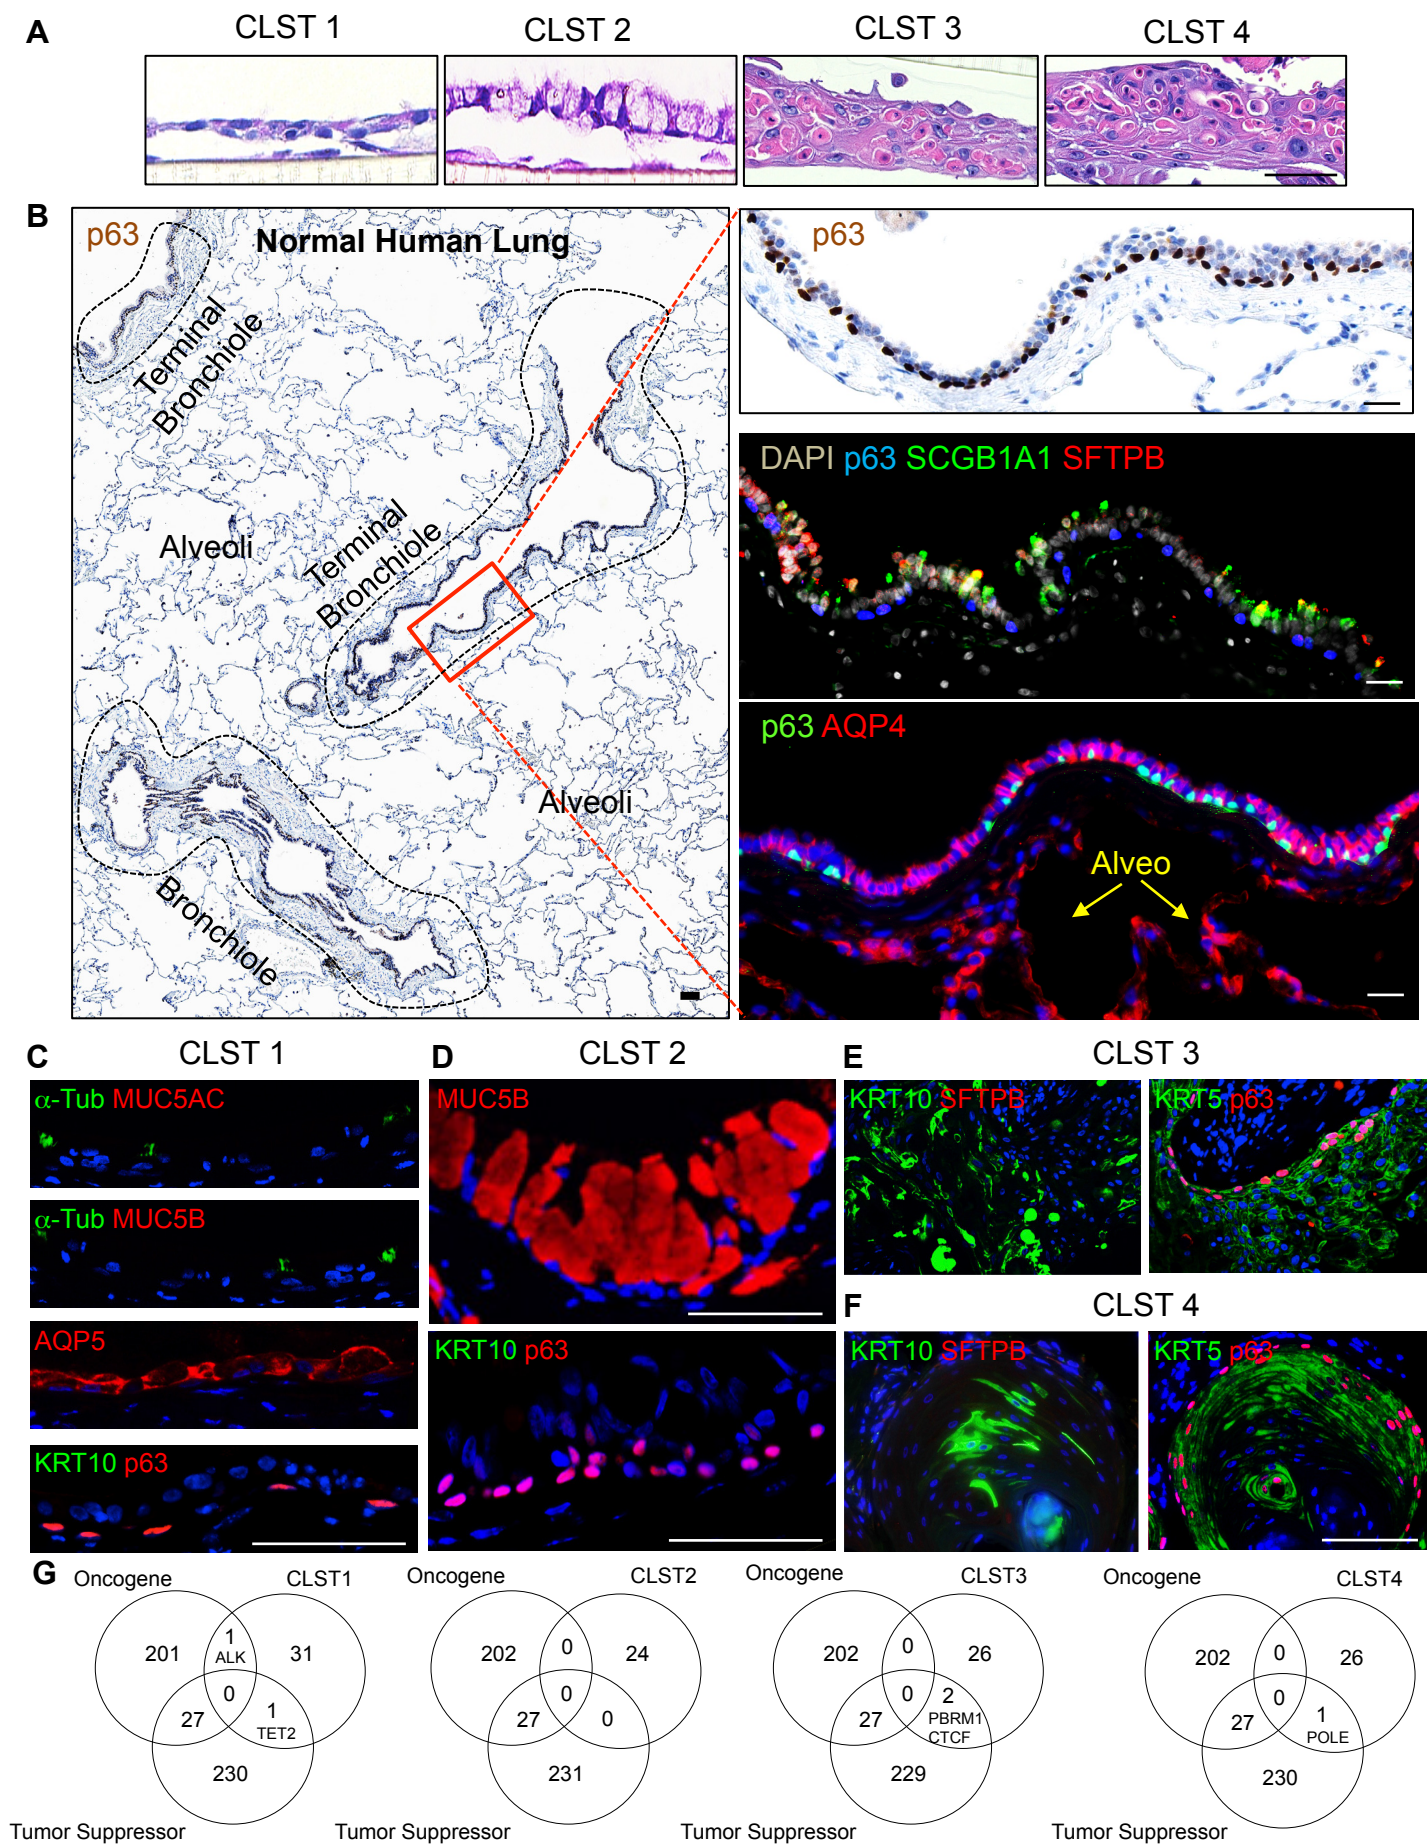

Supplement: NIHMS1580700-supplement-1.pdf [file NIHMS1580700-supplement-1.pdf]

Figure S2 related to Figure 3

A

Normal Human Lung (SPN-35)

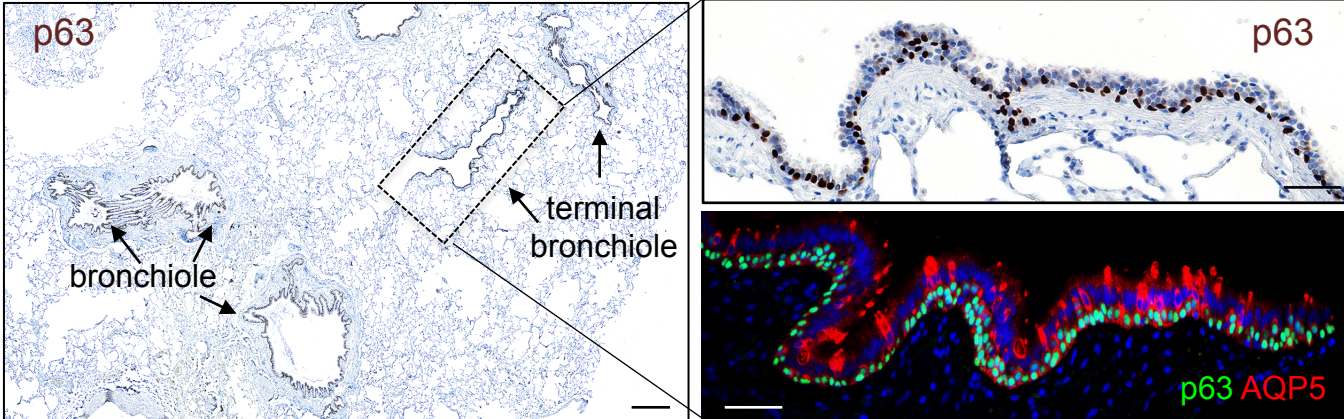

B

COPD Human Lung (SPN-41)

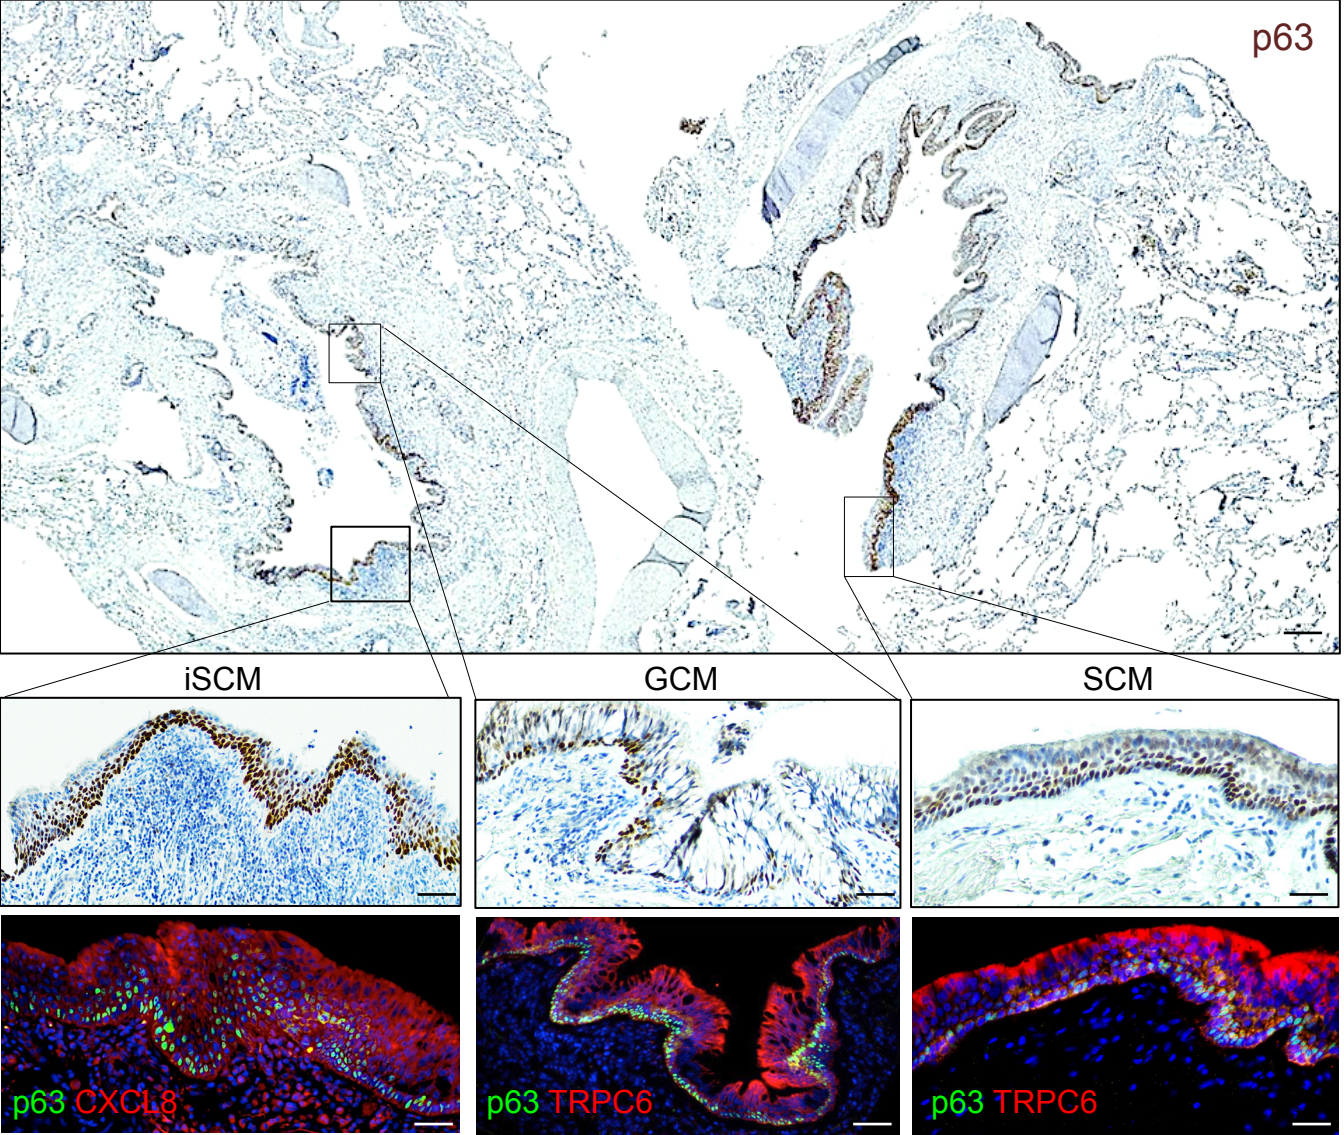

Supplement: NIHMS1580700-supplement-2.pdf [file NIHMS1580700-supplement-2.pdf]

Figure S3 related to Figure 3

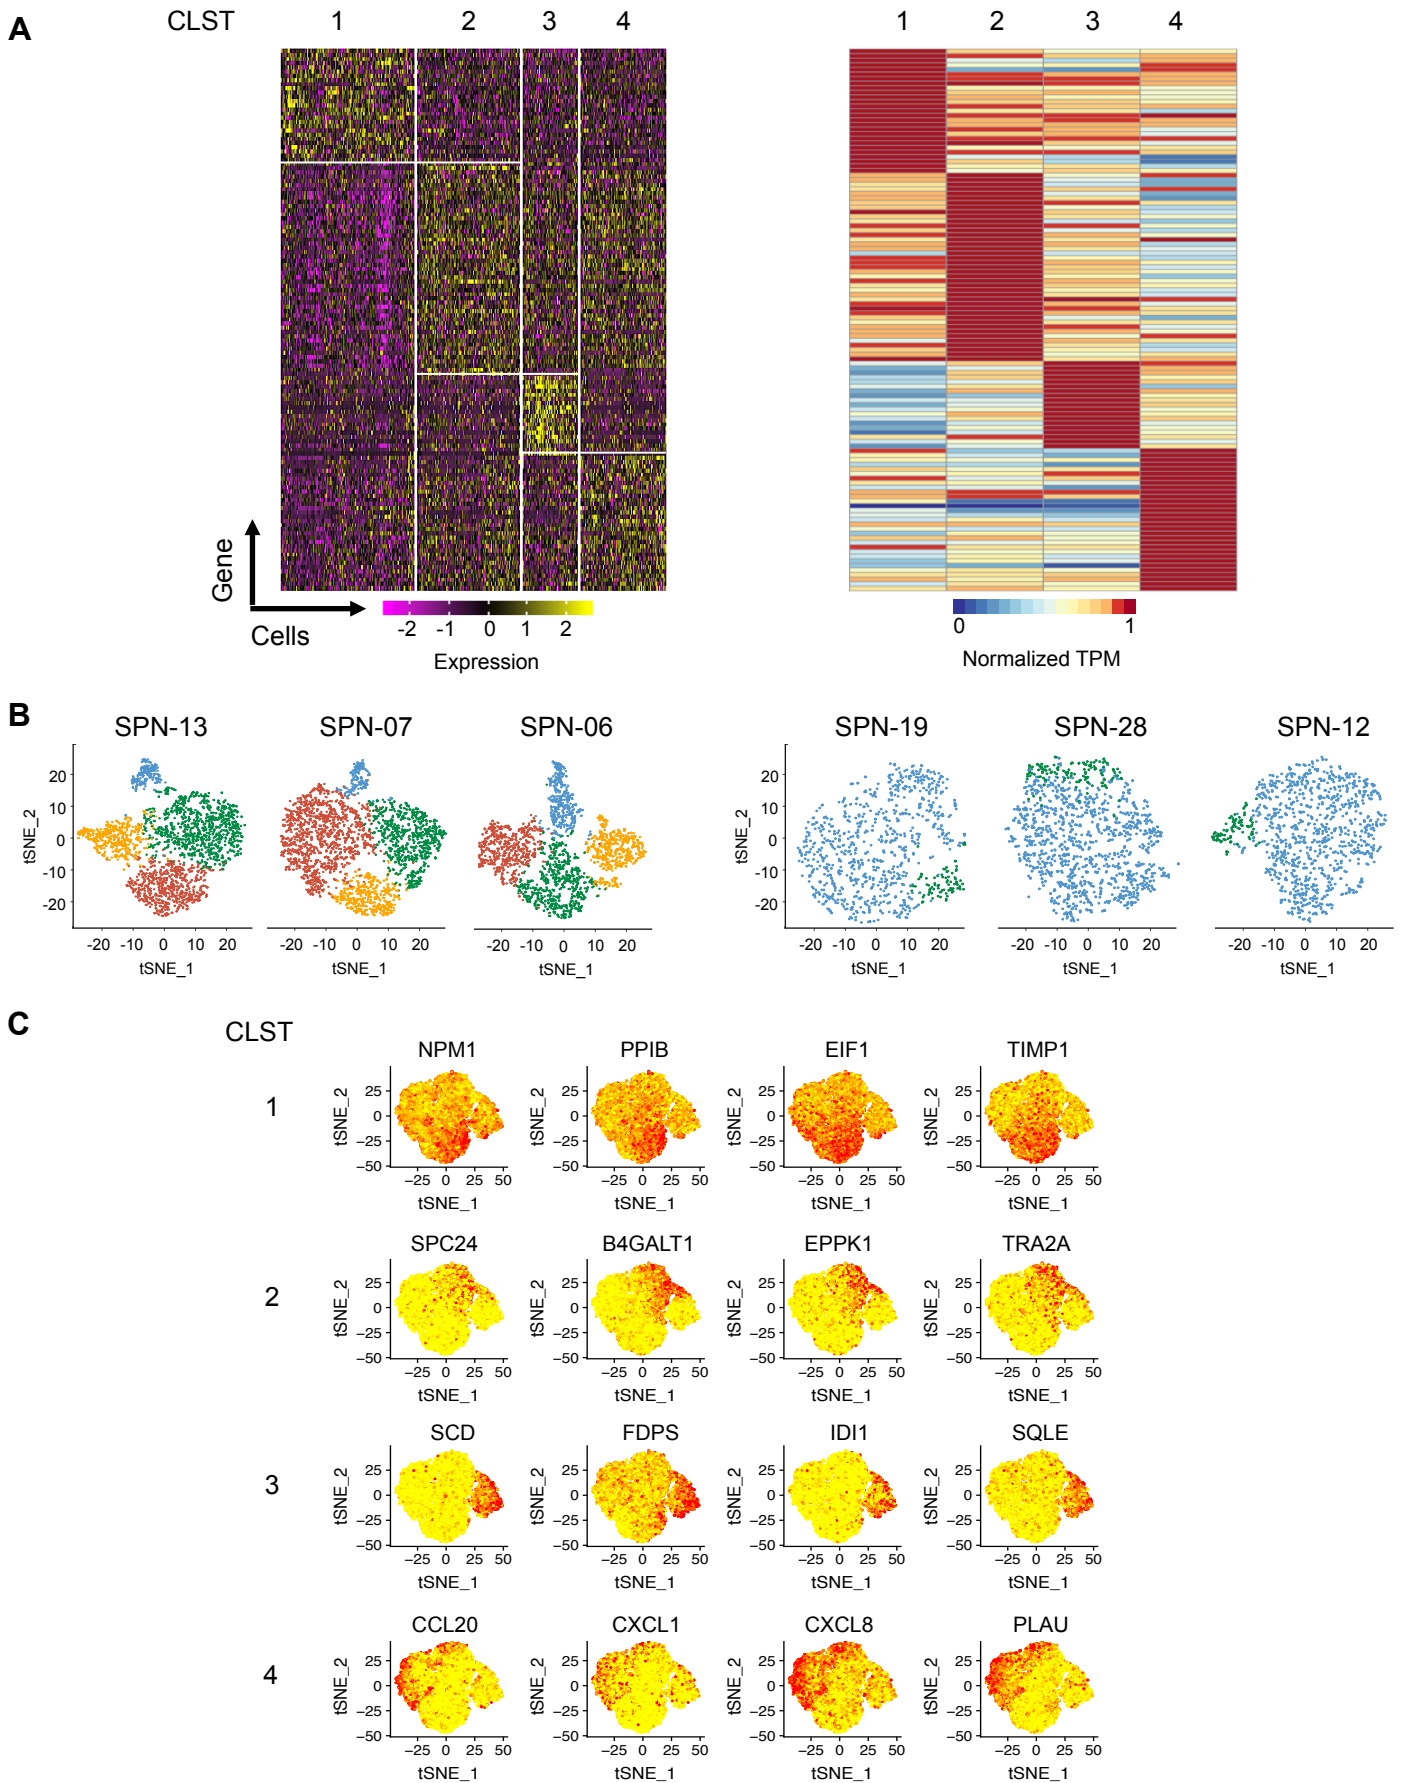

Supplement: NIHMS1580700-supplement-3.pdf [file NIHMS1580700-supplement-3.pdf]

Figure S4 related to Figure 4

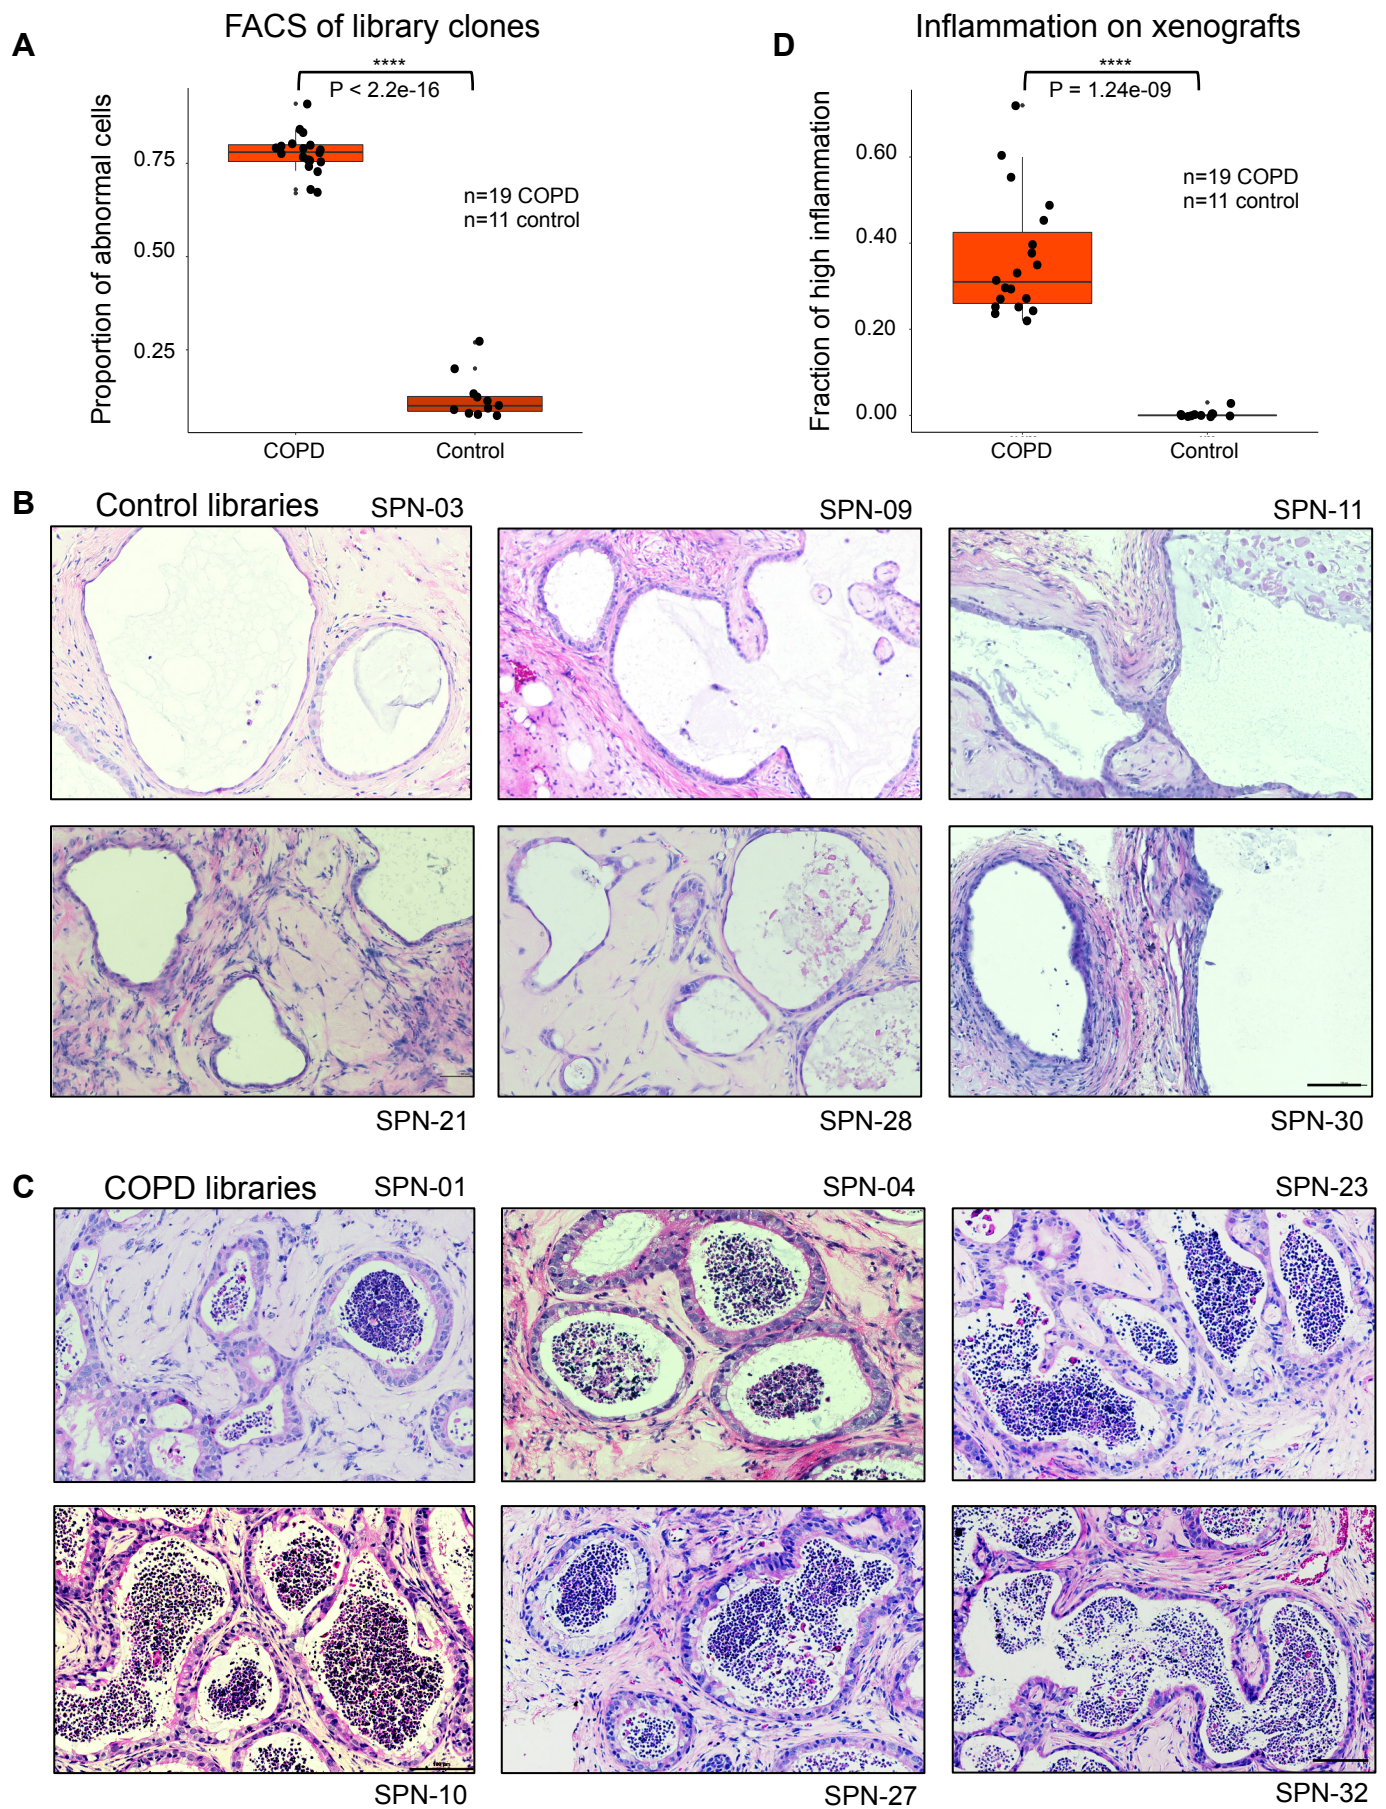

Supplement: NIHMS1580700-supplement-4.pdf [file NIHMS1580700-supplement-4.pdf]

Figure S5 related to Figure 5

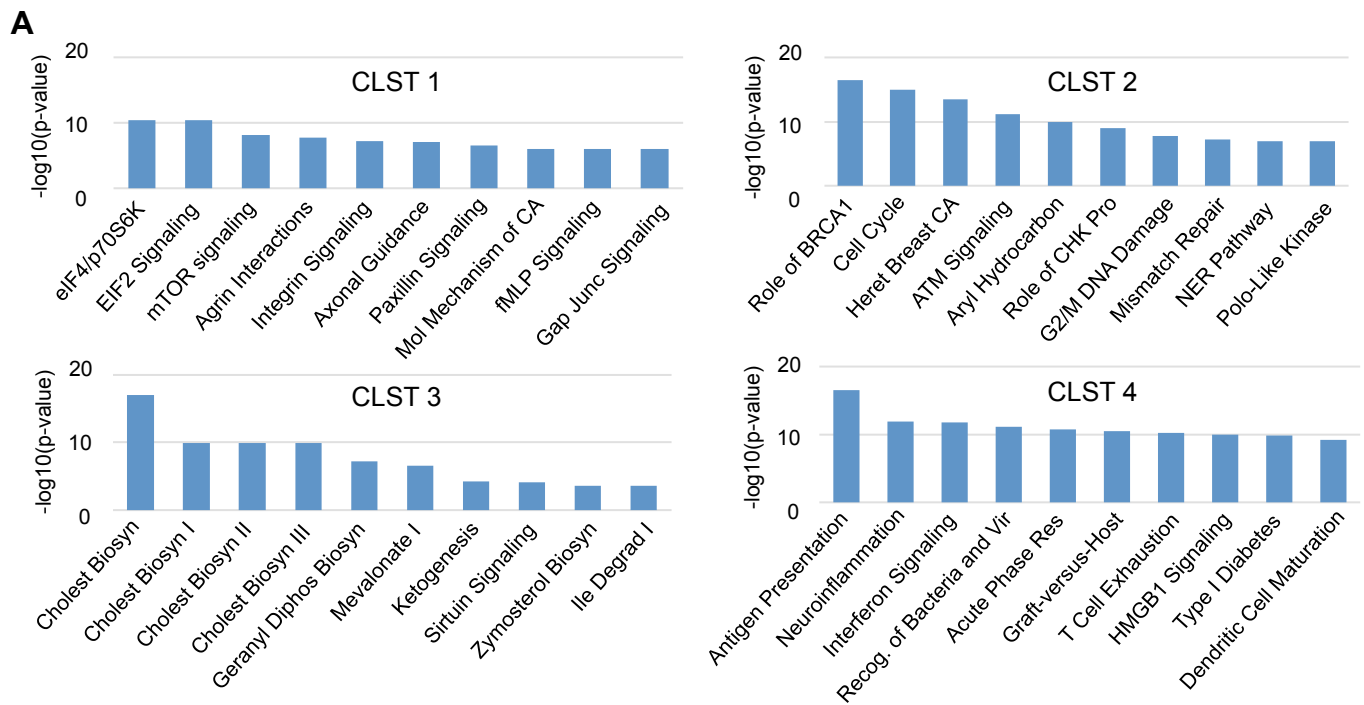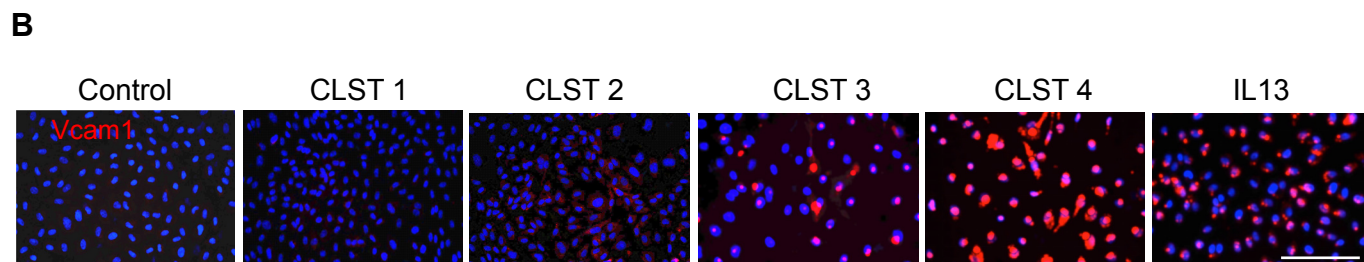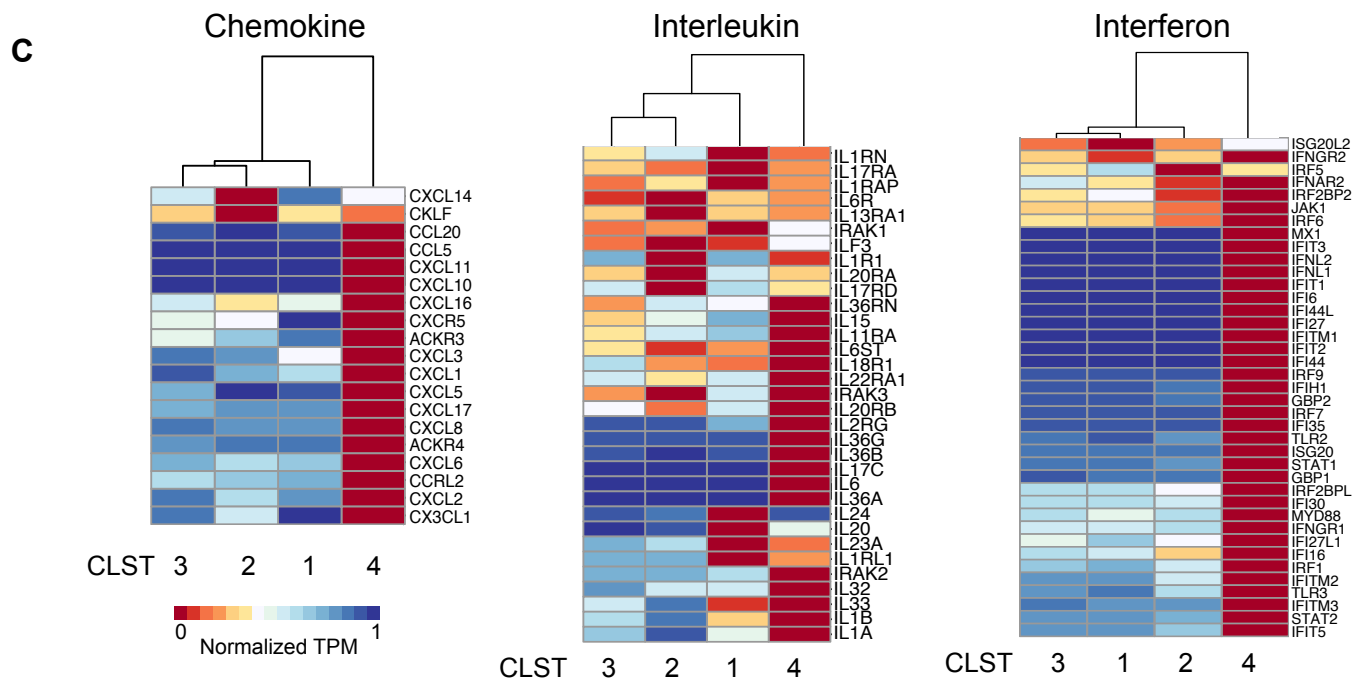

Supplement: NIHMS1580700-supplement-5.pdf [file NIHMS1580700-supplement-5.pdf]

Figure S6 related to Figure 6

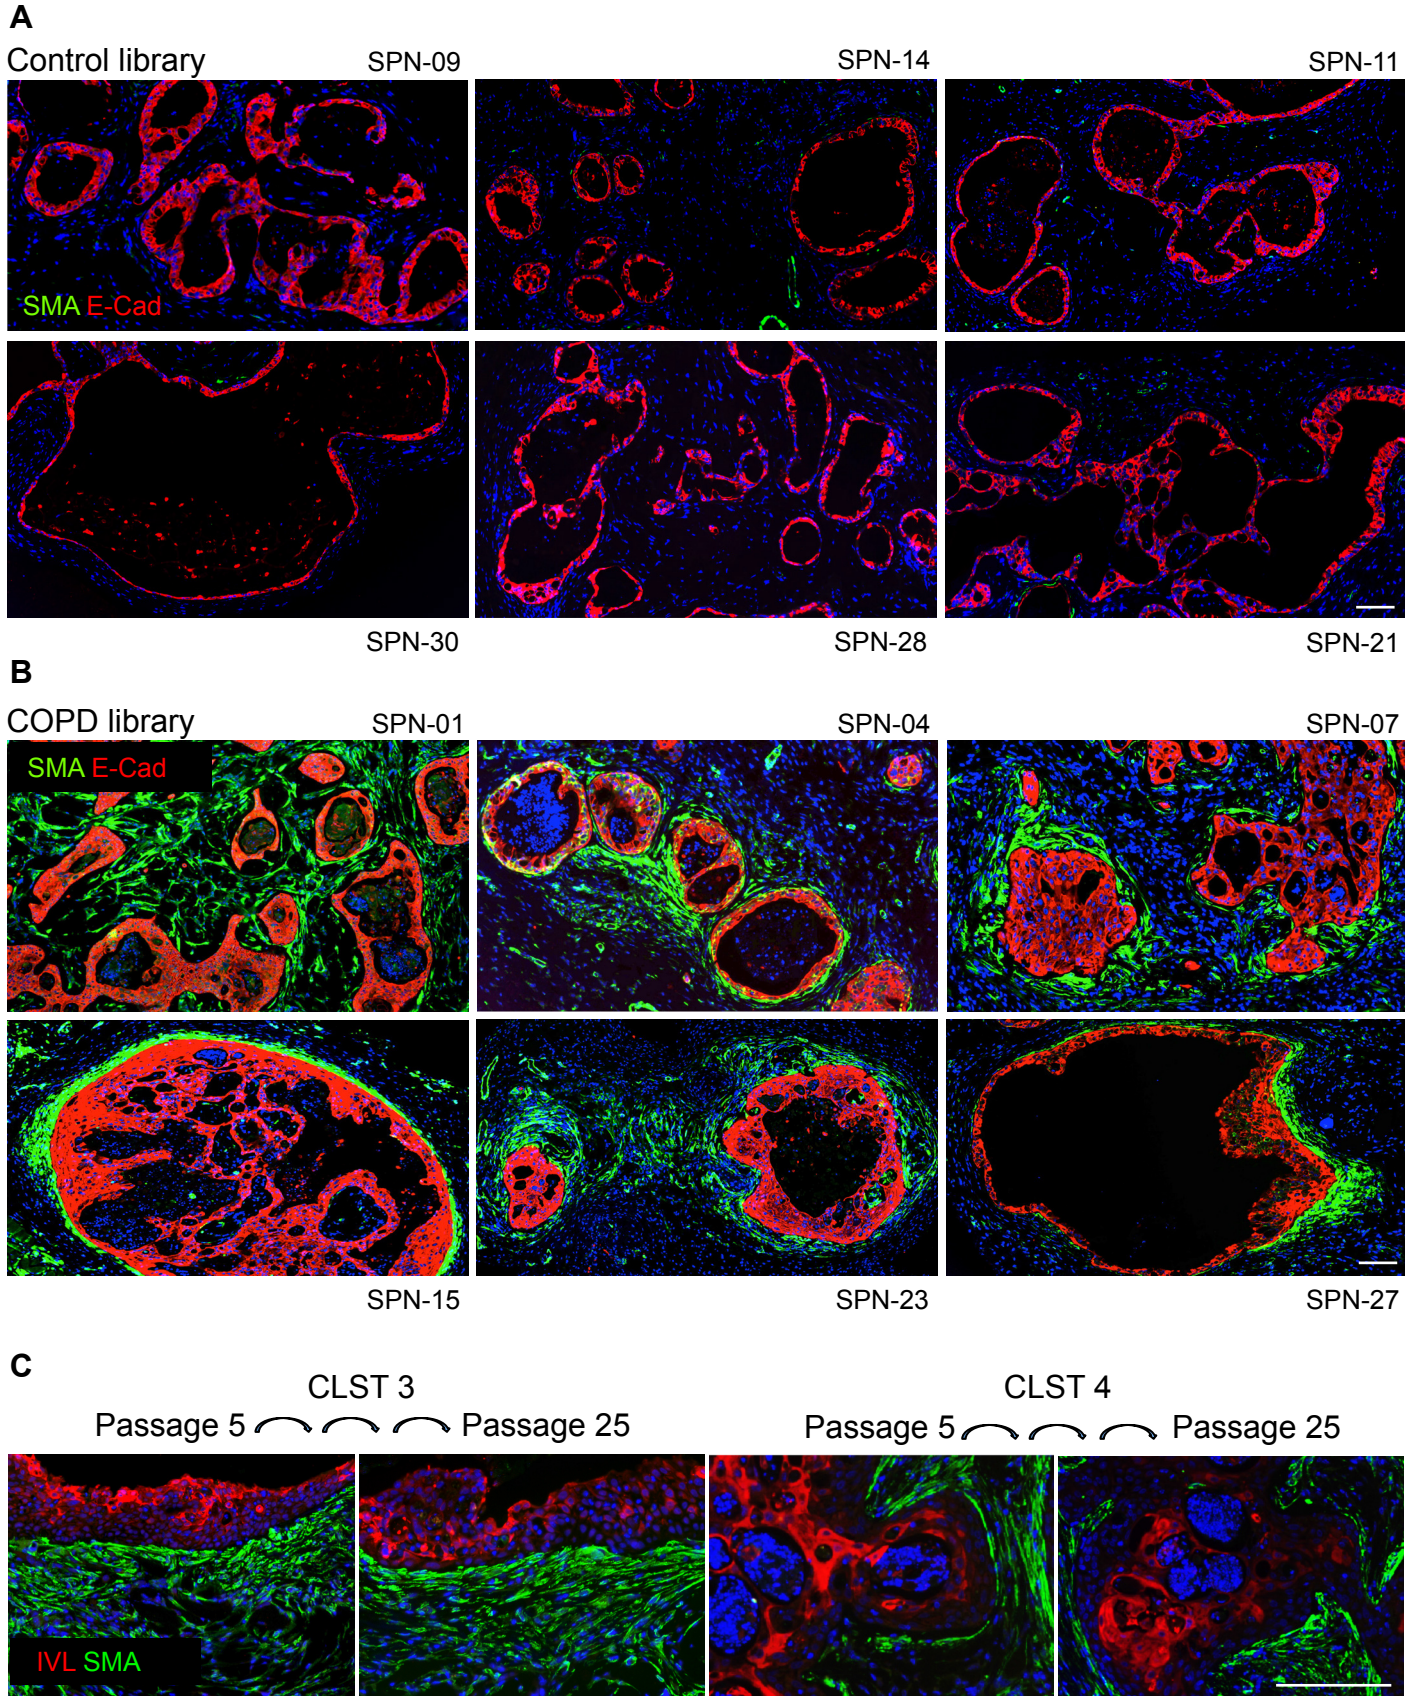

Supplement: NIHMS1580700-supplement-6.pdf [file NIHMS1580700-supplement-6.pdf]

Figure S7 related to Figure 7

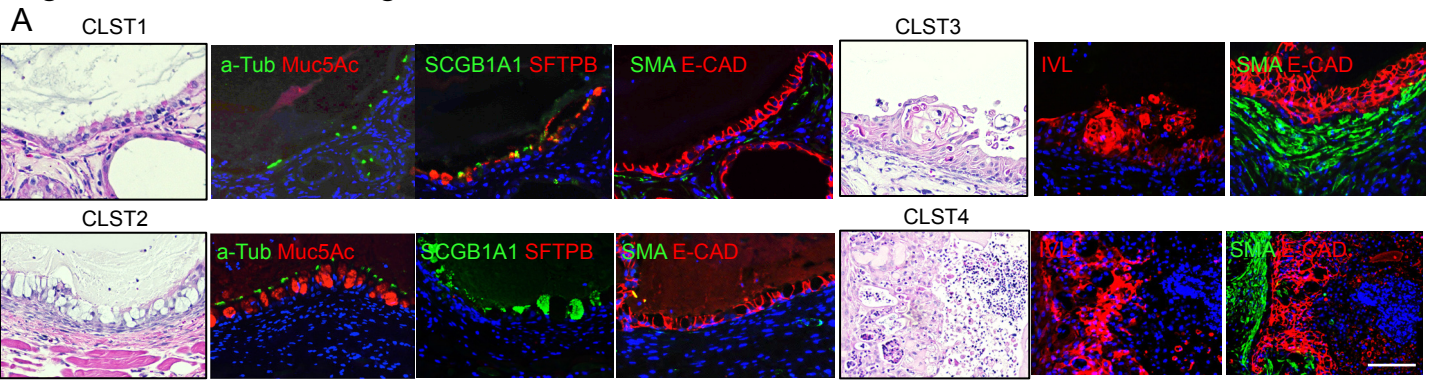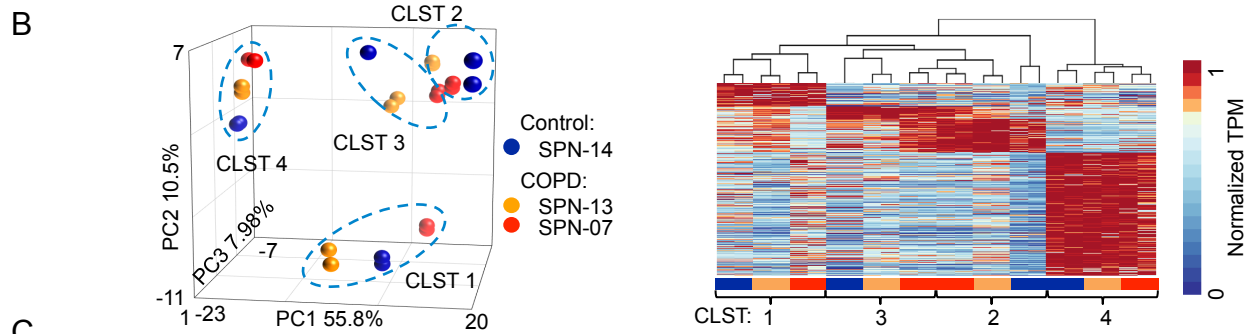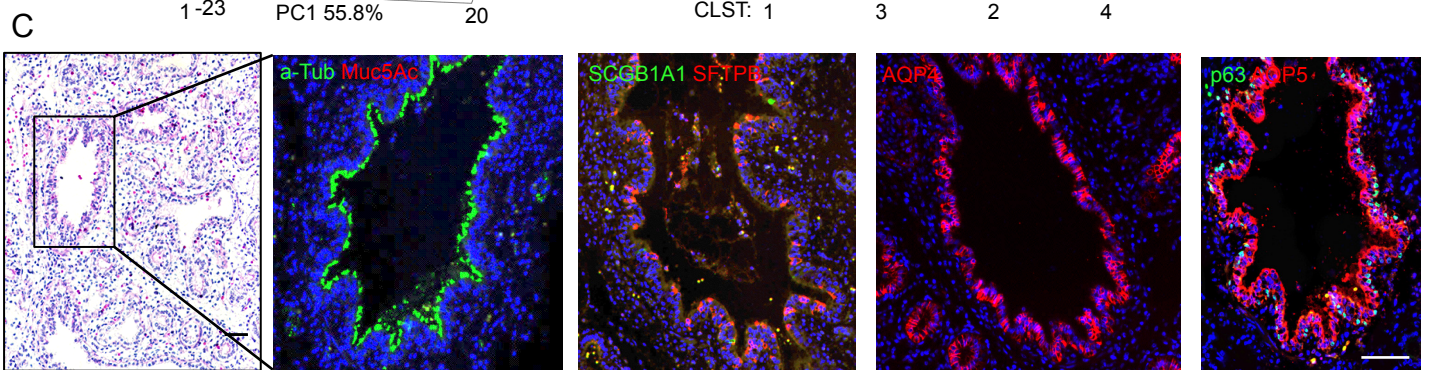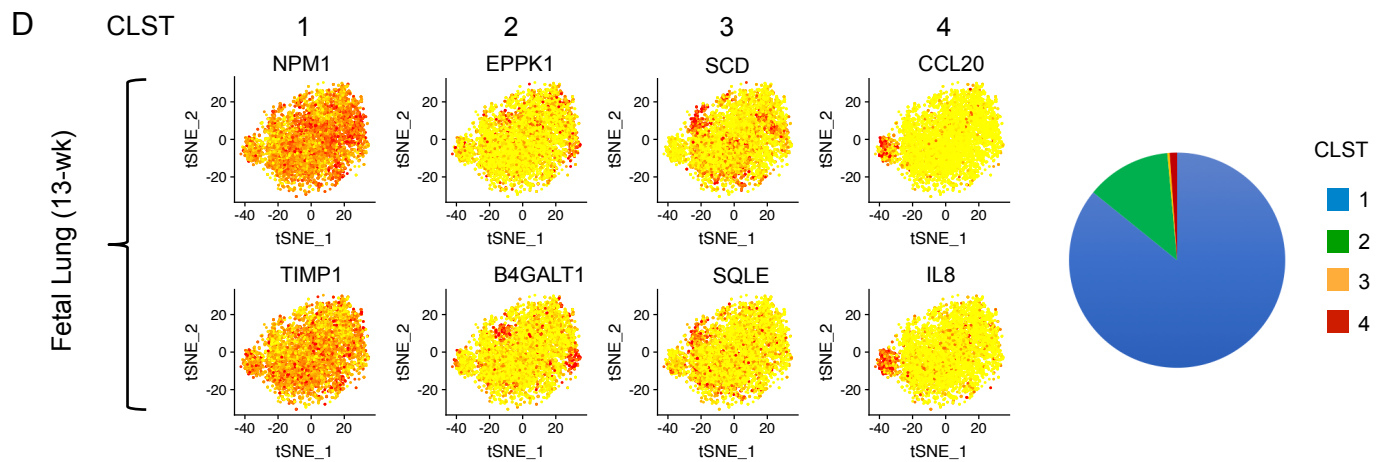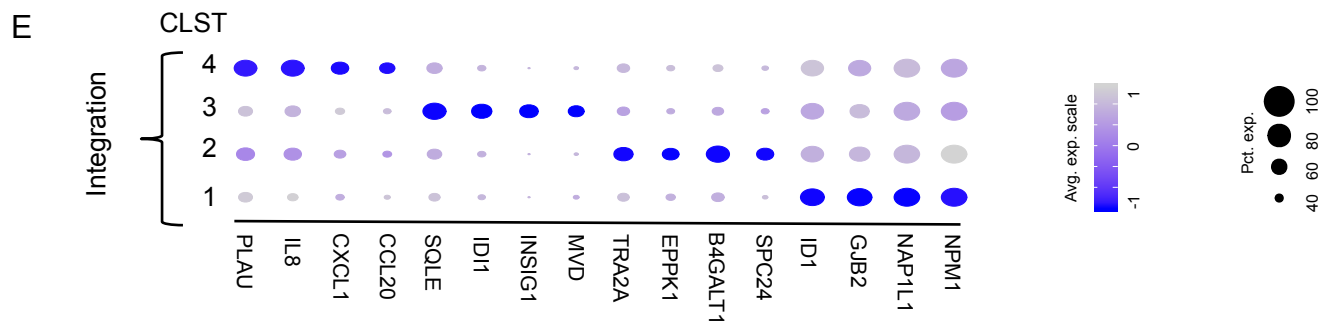

Supplement: NIHMS1580700-supplement-7.pdf [file NIHMS1580700-supplement-7.pdf]
